# Supplementary material for: A heterogeneous human immunodeficiency virus-like particle (VLP) formulation produced by a novel vector system
Source: PubMed Central journal article supplement (PMC5775397; doi:10.1038/s41541-017-0040-6), 2018-01-19
Supplement: 41541_2017_40_MOESM1_ESM.pdf [file 41541_2017_40_MOESM1_ESM.pdf]

Figure S1

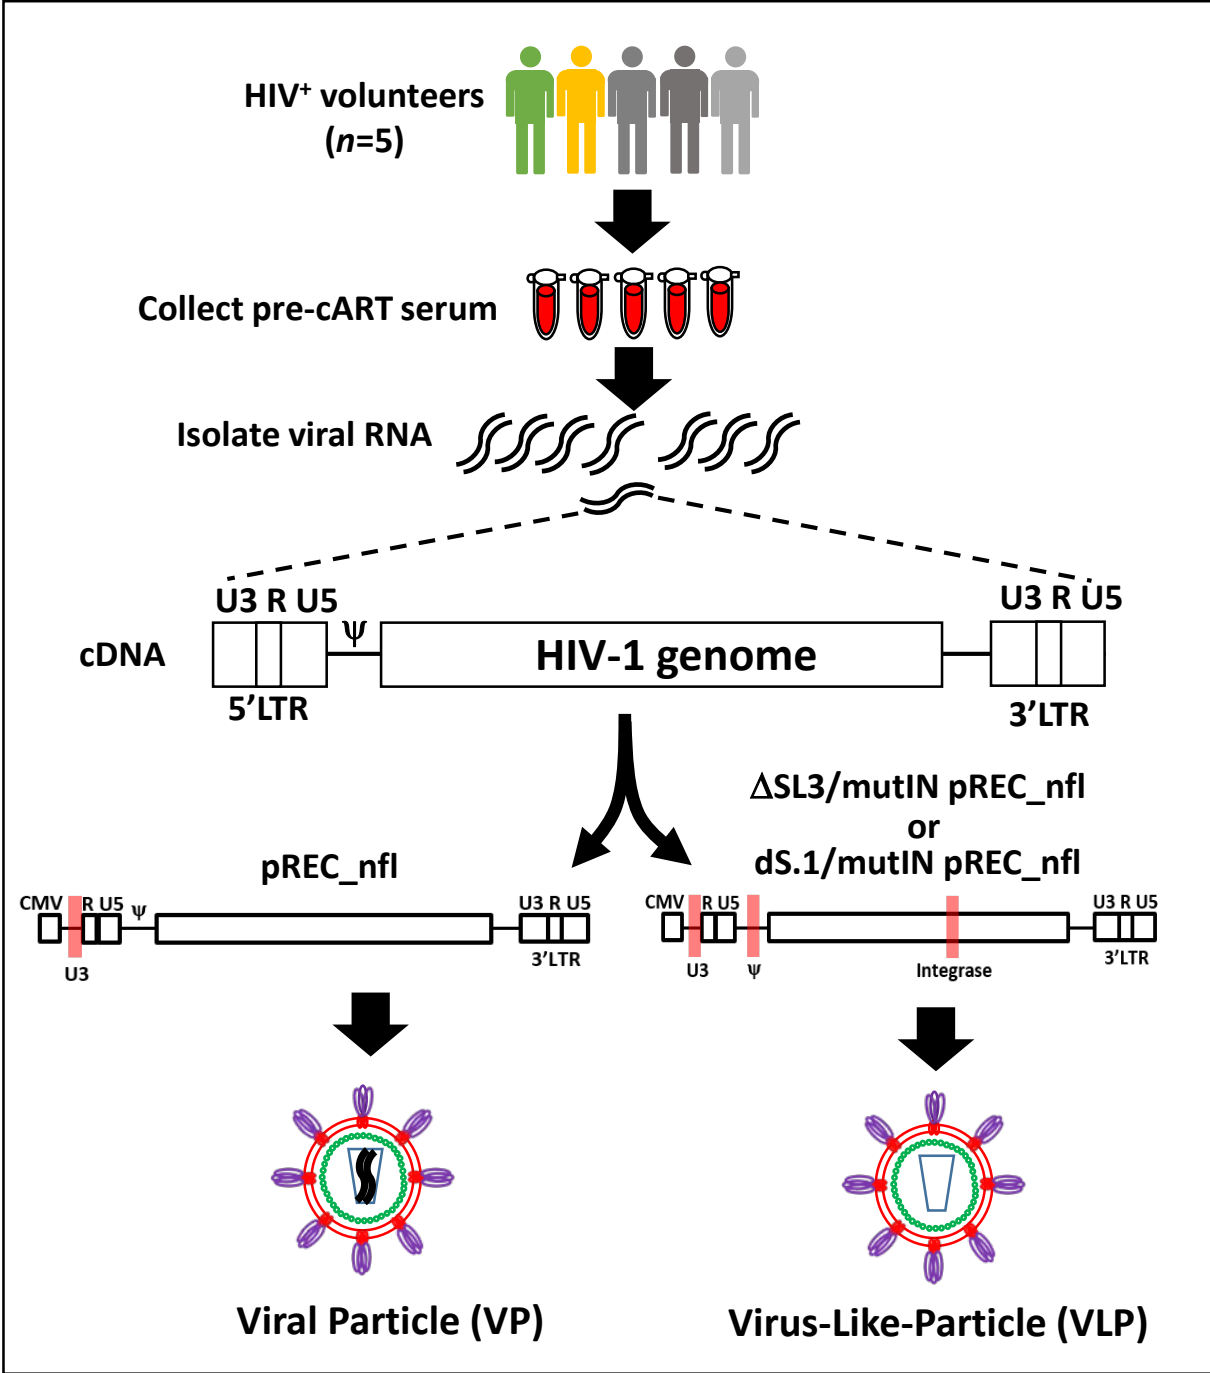

Figure S2

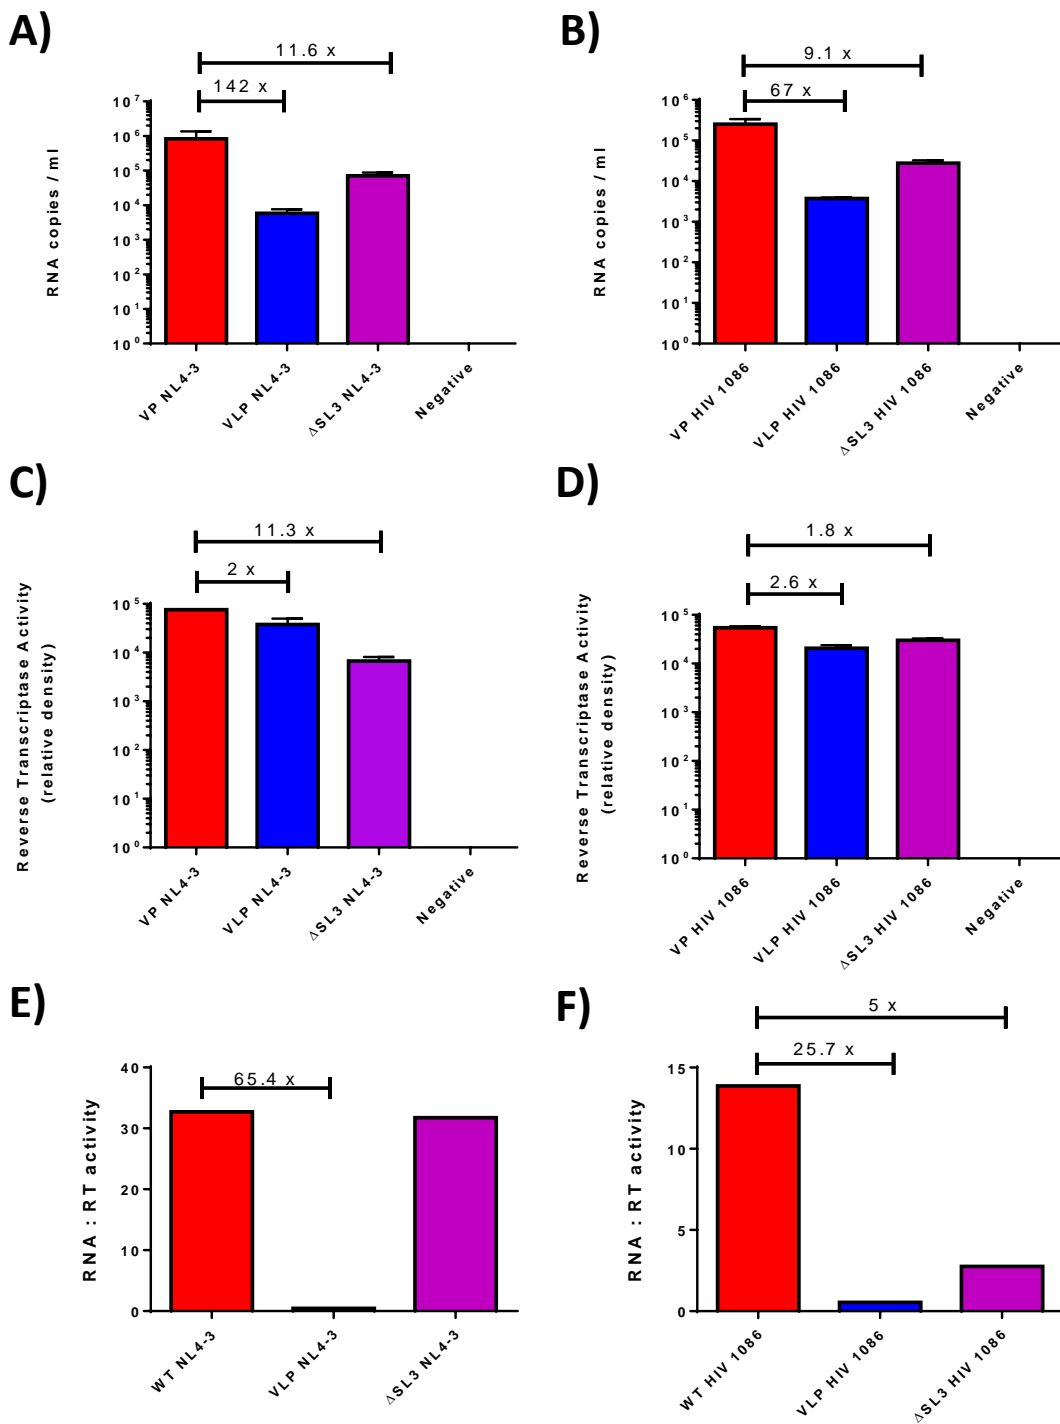

Figure S3

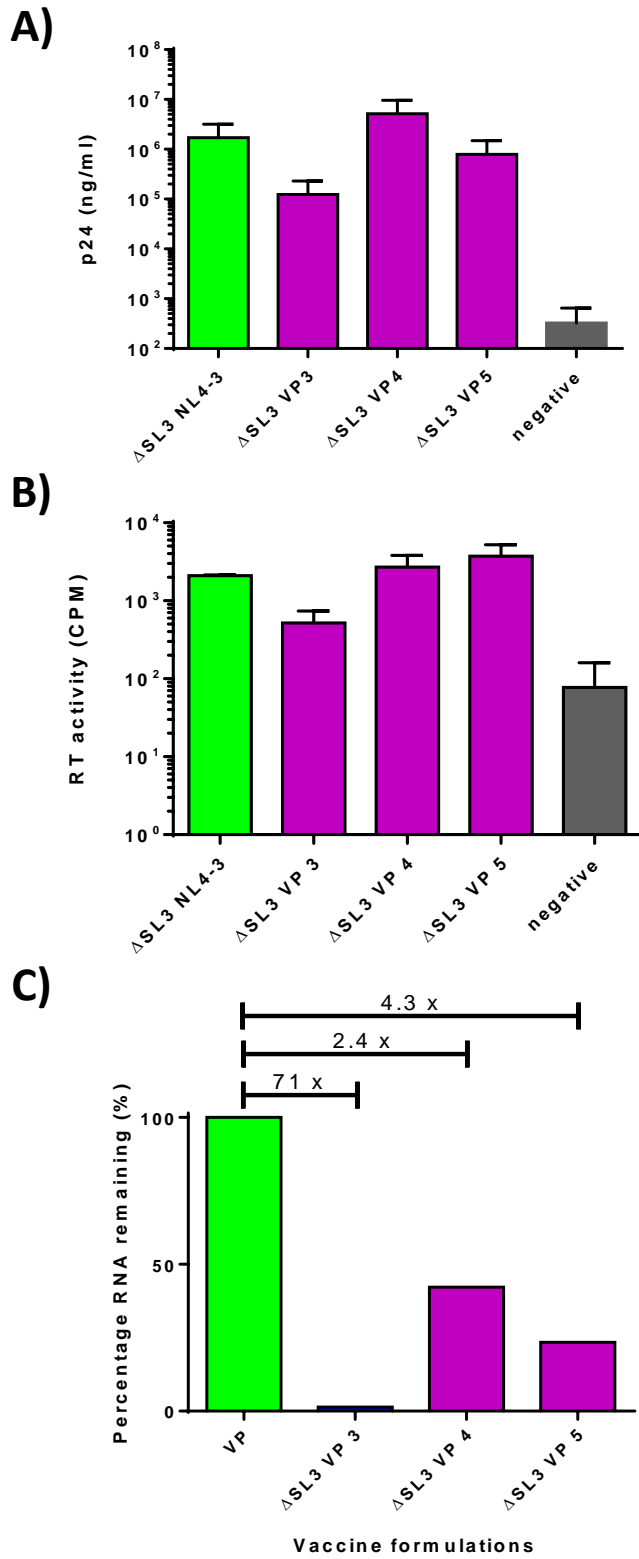

**Figure S4**

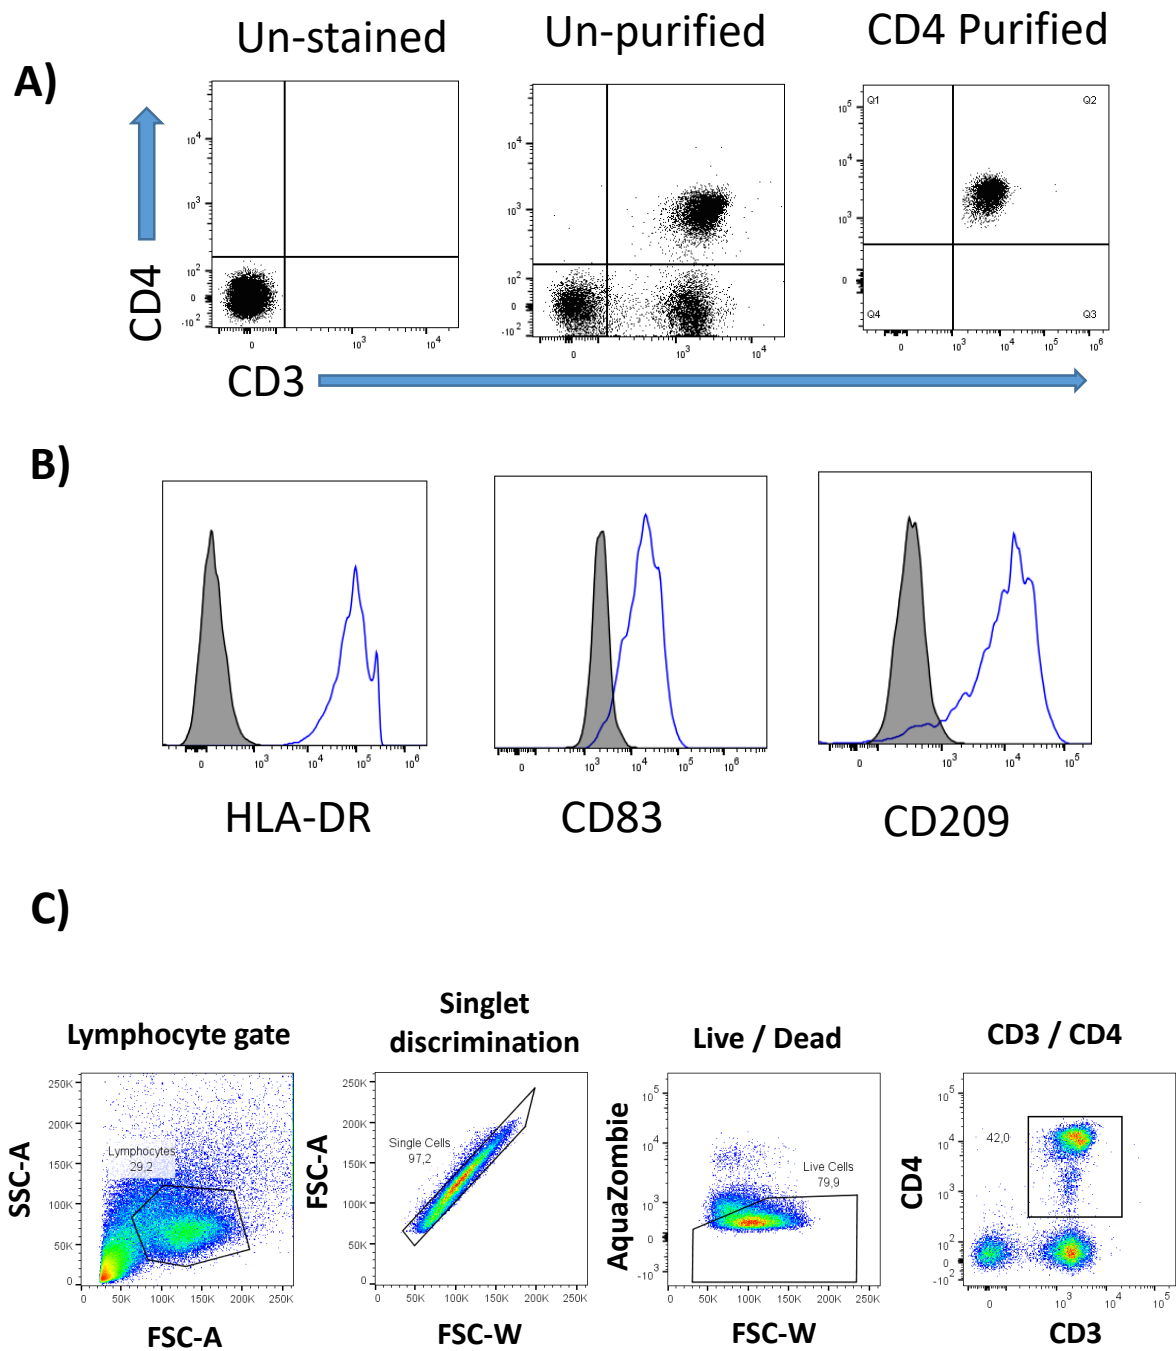

**Figure S5**

**A)**

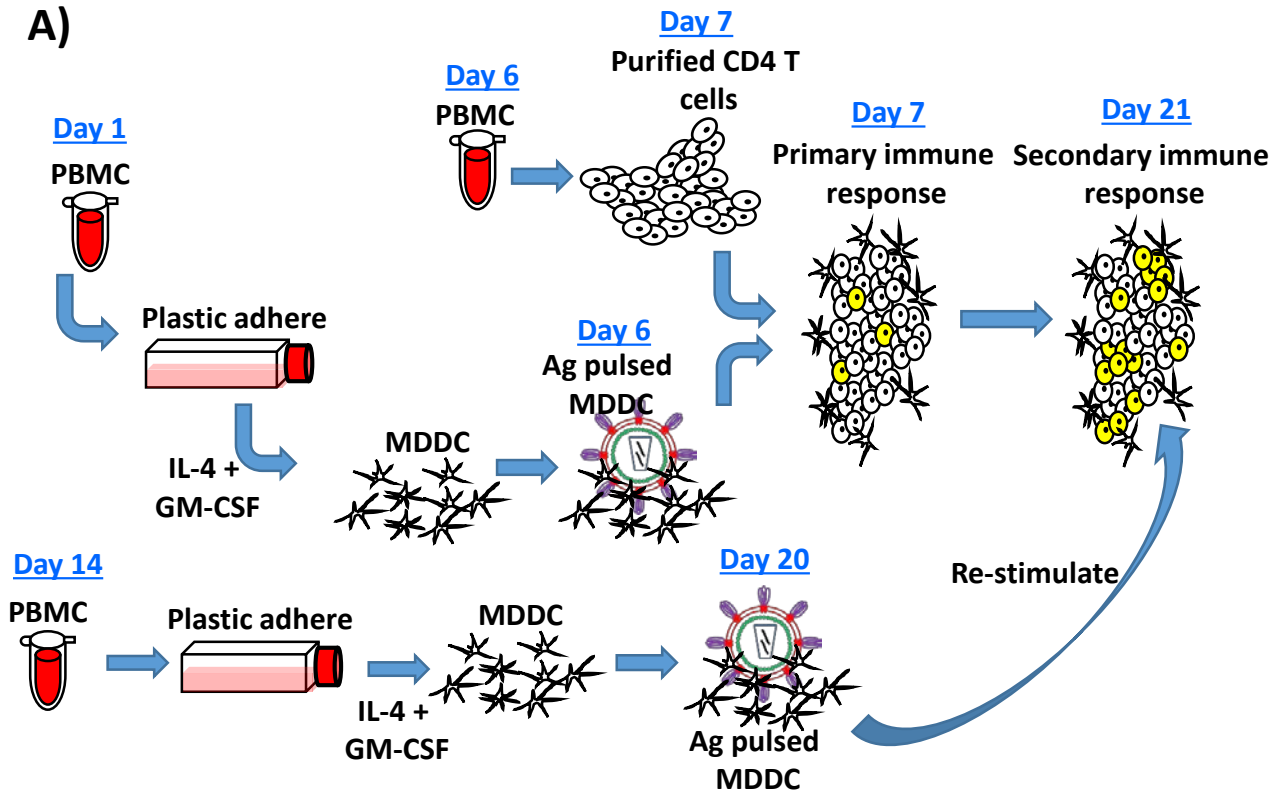

**B)**

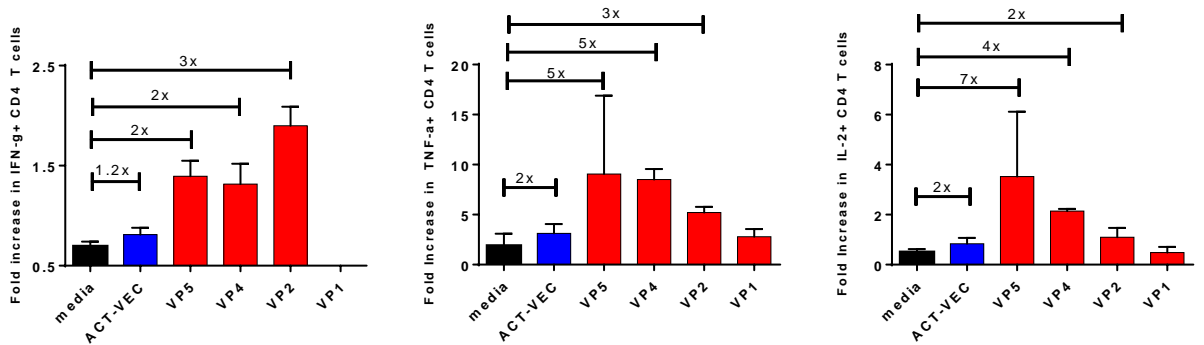

Table S1

|                      | Primer    | Sequence                                                                        |
|----------------------|-----------|---------------------------------------------------------------------------------|
| RNA -<br>cDNA<br>PCR | 1.R3.B3.R | ACTACTTGAAGCACTCAAGGCAAGCTTTATTG                                                |
|                      | 5202R     | TTCTATGGAGACTCCCTGACCCAAATGCCA                                                  |
|                      | 517F      | CTTAAGCCTCAATAAAGCTTGCCTTGA                                                     |
| 1st Round<br>PCR     | 1.Int.R1  | CTTGCCACACAATCATCACCTGCCAT                                                      |
|                      | 1.Int.F1  | ACAGCAGTACAAATGGCAGTATT                                                         |
|                      | 9626R     | CTTGAAGCACTCAAGGCAAGCTTTATTG                                                    |
|                      | Primer F  | GGCGGCGACTGGTGAGTACGCCAAAAATTTGACTAGCGGAGGCTAGAAGGAGAGAGATGG                    |
| 2nd Round PCR        | ΔSL3      | GAGGCGAGGGGCGGCGACTGGTGAGTACGCCAGATGGGTGCGAGAGCGTCGGTATTAAGCG                   |
|                      | dS.1      | GCAGGATTTCGGCTTGCTGAAGCGCGCAGTCGTTTCAGGCGAAGGGCGGCGACTGGTGAGTACG                |
|                      | Int.R2    | CAATCATCACCTGCCATCTGTTTTCCATAATCCCTGATGATCTTTGCGTGTGCTGCTGGCACTACTTTTATGTC      |
|                      | Int.F2    | TGGAAAGGTGAAGGGGCGTAGTAATACAAGATAATAGTGACATAAAAAGTAGTGCCAGCAGCACACGCCAAAGATCATC |
|                      | 47M       | TCCCTAGTTAGCCAGAGAGCTCCC                                                        |
|                      | qRT-PCR   | 5'LTR PA                                                                        |
| GagF                 |           | GGAGCTAGAACGATTTCGCAG                                                           |
| GagR                 |           | CTTACTTTTGTGCTCTTC                                                              |

Table S2

| Volunteer      | Total number of sequence |        | Number of unique sequences |      | Average distance (s/nt) |          |
|----------------|--------------------------|--------|----------------------------|------|-------------------------|----------|
|                | VP                       | VLP    | VP                         | VLP  | VP                      | VLP      |
| <b>1</b>       | 2768                     | 1641   | 74                         | 31   | 0.022360                | 0.001608 |
| <b>2</b>       | 1891                     | 1240   | 50                         | 22   | 0.005417                | 0.002445 |
| <b>3</b>       | 4446                     | 1874   | 98                         | 39   | 0.002402                | 0.001327 |
| <b>4</b>       | 1840                     | 1521   | 49                         | 23   | 0.001944                | 0.001701 |
| <b>5</b>       | 3427                     | 1498   | 54                         | 38   | 0.001922                | 0.001980 |
| <b>Average</b> | 2874.4                   | 1554.8 | 65                         | 30.6 | 0.006809                | 0.017812 |

## Supplemental information (SI):

### Supplemental Figure Legends:

**Supplemental Figure 1: Schematic of the VP and VLP cloning protocol:** Schematic representation of the VP and VLP cloning strategy. Serum from consented HIV+ volunteers was used to extract viral RNA and generate two overlapping cDNA fragments. The cDNA is then used in a nested PCR reaction to generate two overlapping fragments of viral DNA for recombination in yeast using our in-house developed pREC\_Δgag-U3 recombination vector. In the nested PCR, mutagenic primers dS.1 or ΔSL3 insert extensive nucleotide substitutions in stem loop 1 of the RNA packaging sequence or delete stem loop 3. Successful recombination in yeast and subsequent bacterial amplification results in pREC\_nfl or ΔSL3/mutIN pREC\_nfl or dS.1/mutIN pREC\_nfl DNA for use in VP and VLP production. Areas where modifications to the viral genome were introduced are indicated by red shading. Graphics depicted in this figure were generated by the authors.

**Supplemental Figure 2: Comparison of the impact on RNA packaging by differently engineered RNA packaging mutations.** pREC\_nfl plasmid constructs using NL4-3 and HIV 1086 as the vector backbone were constructed with mutations in stem loop 1 (SL1, VLP) or deletion of stem loop 3 (ΔSL3). The ability of the SL1 or SL3 modifications to impact RNA packaging in NL4-3 and HIV 1086 were assessed using 293T cell transient transfections and qRT-PCR with a gag primer set (**A and B**). The mean RNA copies/ml (+/-SEM) are shown. Viral particles (VP) lacking modifications to the RNA packaging sequence and media were used as positive and negative control respectively. Reverse transcriptase activity in the NL4-3 and HIV 1086 VP and VLP formulations were assessed using radioactive reverse transcriptase assay and densitometry readings on radiographical film (**C and D**). The ratio of RNA to reverse transcriptase activity was calculated for the SL1 VLP and ΔSL3 modified NL4-3 and HIV 1086 formulations (**E and F**).

**Supplemental Figure 3: The deletion of stem loop 3 (ΔSL3) causes RNA packaging defects in viral particles.** The ΔSL3 mutagenic primer was used in the nested PCR reaction for the five cDNA's derived from HIV+ volunteer samples. Of the five ΔSL3 VPs, only ΔSL3 VP 3, 4 and 5 resulted in successful recombinants in yeast. The DNAs were then used to transfect bacteria and subsequently transfect 293T cells. The purified ΔSL3 VP 3-5 were assayed for p24 content (**A**) in culture supernatants by ELISA and for reverse transcriptase activity using a radioactive RT assay (**B**). The percentage RNA in ΔSL3 VP 3-5 were determined, by first isolating viral RNA and generating cDNA, before using qRT-PCR and a gag primer set to quantify viral genomic levels (**C**). Results for ΔSL3 VP 3-5 RNA levels are shown as percentage RNAs relative to the volunteer matched and unmodified VPs.

**Supplemental Figure 4:** Cryopreserved PBMC from fully consented HIV+ volunteers under continuous anti-retroviral treatment where used in these studies. PBMC were defrosted and CD4<sup>+</sup> T cells isolated by magnetic isolation and negative selection. The purity of the isolated CD4<sup>+</sup> T cells was determined by live/dead cell gating prior to CD3<sup>+</sup> and CD4<sup>+</sup> gating. A representative flow cytometry plot is shown (**A**). PBMC were defrosted to generate MDDC. Initially, PBMC were allowed to plastic adhere in tissue culture flasks monocytes before incubation for 6 days in the presence of IL-4 and GM-CSF. Immature DC were then phenotypically characterized by flow cytometry using HLA-DR, CD83 and CD209 antibodies (**B**). To evaluate Het\_B\_ACT-VEC and VP immunogenicity, the formulations were used to pulse the prepared MDDC overnight, followed by co-incubating the MDDC with autologous CD4<sup>+</sup> T cells. The flow cytometry gating strategy used to characterize define the CD4<sup>+</sup> T cells used in the immunogenicity studies is shown (**C**).

**Supplemental Figure 5:** Cryopreserved PBMC from healthy donor volunteers where used in these studies. A schematic of the assay used to determine primary and secondary immune reactivity towards ACT-VEC and VPs 1,2,4 and 5 is shown (**A**). The ability of Het\_B\_ACT-VEC and VP1,2,4 and 5 to induce primary and secondary immune



responses were assessed by flow cytometry for IFN- $\gamma$ , IL-2 and TNF- $\alpha$  using an LSRII and both FACS Diva and Flowjo software (**B**).

**Supplemental Table 1: Primers used in VP and VLP production.**

**Supplemental Table 2: Characterization of pREC\_nfl sequence diversity.** The five pREC\_nfl DNA's derived from HIV+ volunteers (VP) were assessed by next generation sequencing (NGS). The corresponding four dS.1/mutIN VLPs (1-4) and Het\_B\_ACT-VEC (VLP 5) DNA's were also characterized after nested PCR induced RNA packaging site disruption (dS.1) and nucleotide substitutions in Integrase (mutIN). The total number of sequences derived from NGS runs using the VP and VLP plasmid DNA's, the number of unique sequences within each DNA sample used to generate VP and VLP samples and the calculated average distance (substitutions/nucleotides) in each DNA preparation is shown. To determine the number of unique sequences, the total number of sequences in the samples were collapsed using on-line Galaxy software. The genetic distance was calculated using MEGA 6 software.
